# Supplementary material for: Zn-MOF-8-based nitrogen-doped mesoporous carbon/multi-walled carbon nanotube-modified electrodes for highly sensitive detection of isoquercitrin
Source: Royal Society of Chemistry journal article supplement (doi:10.1039/d5ay01823d), 2025-12-16
Supplement: d5ay01823d1.pdf [file d5ay01823d1.pdf]

**Zn-MOF-8-Based Nitrogen-Doped Mesoporous Carbon/Multi-Walled Carbon Nanotube-Modified Electrode for Highly Sensitive Detection of Isoquercitrin**

Wei Liu<sup>\*a,b</sup>, Zi Li <sup>a</sup>, Hongfang Li <sup>a</sup>, Qiongyao Zeng <sup>d</sup>, Yanhua Sun<sup>\*a</sup>, Siqi Ding <sup>a</sup>,  
Pingping Huang <sup>a</sup>, Pengli Zhang<sup>\*c</sup>, Zhiyong Zhu <sup>a</sup>, Zimo Zhang <sup>a</sup>

<sup>a</sup> School of Environment and Life Health, Anhui University of Applied Technology, Hefei city, Anhui province, 230011, P.R. China; Ministry of Education Collaborative Innovation Center for Chemistry and Life Sciences, Hefei, Anhui Province, 230011, China.

<sup>b</sup> College of Civil Engineering, Anhui Jianzhu University, Hefei, Anhui province, 230601, P.R. China.

<sup>c</sup> The First People's Hospital of Yunnan Province, Kunming 650032, P.R. China.

<sup>d</sup> Yunnan Provincial Hospital of Traditional Chinese Medicine, Kunming 650021, P.R. China  
Yunnan University of Chinese Medicine, Kunming 650500, P.R. China

\*Corresponding author.

E-mail address: [weillau@163.com](mailto:weillau@163.com)/[liuw@uta.edu.cn](mailto:liuw@uta.edu.cn);  
[634808672@qq.com](mailto:634808672@qq.com);  
[zhangpengl2023@163.com](mailto:zhangpengl2023@163.com)

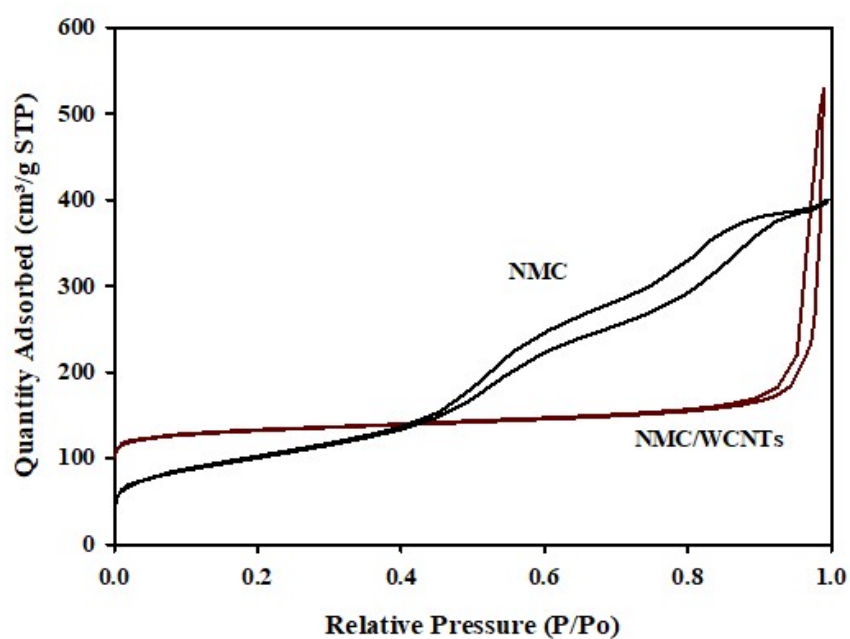

Figure S1 BET surface area analysis diagram for NMC and NMC/WCNTs. The BET surface area of NMC is 357.3184 m²/g, and the BJH Desorption average pore diameter of NMC is 5.4729 nm. The BET surface area of NMC is 428.8741 m²/g, and the BJH Desorption average pore diameter of NMC is 28.6003 nm.

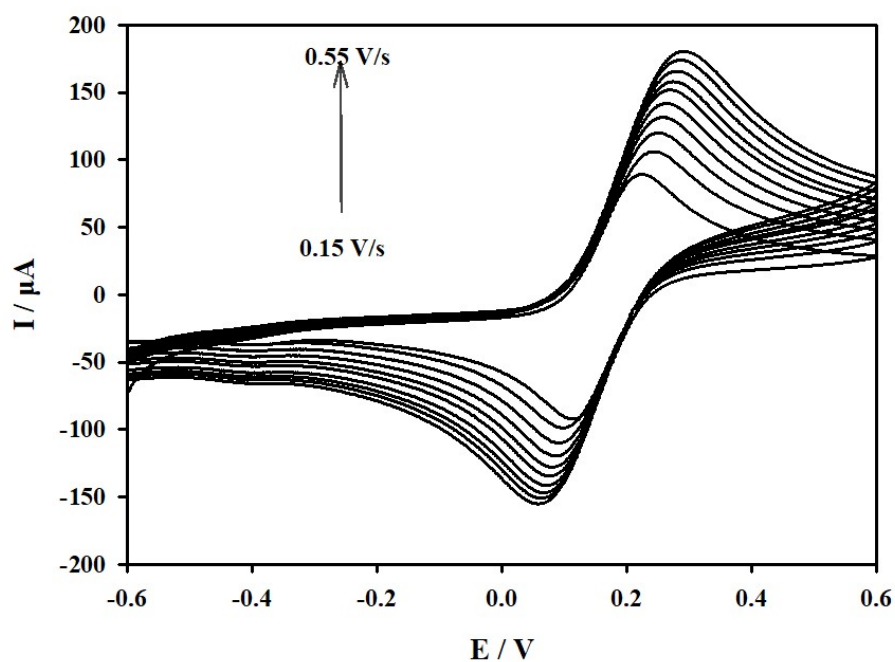

Figure S2 Effect of scan rate on the redox peak current of NMC/MWCNTs/GCE;
